# Supplementary material for: The MHC I immunopeptidome conveys to the cell surface an integrative view of cellular regulation
Source: PubMed Central journal article supplement — Mol Syst Biol. 2011 Sep 27;7:533. doi: 10.1038/msb.2011.68 (PMC3202804; doi:10.1038/msb.2011.68), 2011-09-27
Supplement: msb201168-s1.pdf [file msb201168-s1.pdf]

## SUPPLEMENTARY INFORMATION

### The MHC I immunopeptidome conveys to the cell surface an integrative view of cellular regulation

Etienne Caron, Krystel Vincent, Marie-Hélène Fortier,  
Jean-Philippe Laverdure, Alexandre Bramoullé, Marie-Pierre Hardy, Grégory Voisin,  
Philippe P. Roux, Sébastien Lemieux, Pierre Thibault\*, Claude Perreault\*

\*To whom correspondence should be addressed. E-mail: [pierre.thibault@umontreal.ca](mailto:pierre.thibault@umontreal.ca) (P.T.),  
[claud.perreault@umontreal.ca](mailto:claud.perreault@umontreal.ca) (C.P.)

- **Supplementary Methods.**
- **Figure S1.** Rapamycin does not affect levels of proteins involved in the antigen processing and presentation pathway.
- **Figure S2.** Rapamycin increases the abundance of MIPs presented by MHC Ia molecules.
- **Figure S3.** Cellular processes enriched in the DEM source genes or the DEGs.
- **Figure S4.** DEM source genes are involved in cellular processes and signalling events governed by the mTOR network.
- **Figure S5.** Cytotoxic activity against VNTHFSHL and KALSYASL is MHC-I restricted.
- **Table S1.** Average intensity measured for 422 peptides eluted from untreated or rapamycin treated (for 48h)  $\beta$ 2m-deficient EL4 cells.
- **Table S2.** Relative abundance of 422 MIPs upon rapamycin treatment.
- **Table S3.** GO terms enriched in DEM source genes and DEGs.
- **Table S4.** List of 891 unique peptide source genes encoding H2<sup>b</sup>-peptides.

- **Table S5.** List of components from a comprehensive mTOR interactome and signalling network.
- **Table S6.** Relative expression of DEM source genes at multiple regulatory layers.
- **Table S7.** List of primers for quantitative real-time PCR analyses.

## **Supplementary methods**

### **1. Label-free quantitative proteomics approach**

Label-free quantitative proteomics analyses were performed using ProteoProfile an in-house software that comprises three different modules. The peptide detection module generates an exportable .csv file that includes peptide features (m/z value, charge, retention time, intensity, score) subsequently used for clustering analyses. Intensity threshold was typically set to 10,000 counts for Orbitrap LC-MS experiments. Peptide identified by Mascot are then aligned with their corresponding peptide maps and their intensities across replicates and conditions are correlated by the clustering module using a complete linkage hierarchical clustering algorithm similar to that of Bellew et al (Bellew M., Coram M., Fitzgibbon M., Igra M., Randolph T., Wang P., May D., Eng J., Fang R., Lin C., Chen J., Goodlett, D., Whiteaker J., Paulovich A., McIntosh M. (2006) A suite of algorithms for the comprehensive analysis of complex protein mixtures using high-resolution LC-MS *Bioinformatics* 22 1902-1909). Initially, m/z tolerance of  $\pm 0.035$  Th and a time difference of 1 min are used for clustering. Normalization of retention time is then performed on the initial peptide cluster list using a dynamic and nonlinear correction. A moving-average time-window interpolation scheme is used to compute the time shifts for each peptide across the different data sets. This alignment confines the retention time distribution to less than  $\pm 0.1$  min ( $< 0.3\%$  RSD) on average. Following normalization, peptides are then re-clustered using the complete linkage hierarchical clustering algorithm but with a tighter time tolerance (typically 30 seconds). This clustering analysis enables the comparison of abundance distribution for peptide ions sharing the same m/z, time, charge coordinates. We required confident peptide detection in at least two out of three replicate LC-MS analyses to consider a cluster for subsequent analysis. A simple heuristic function referred to as missing peaks was developed to retrieve missing peptide ions. After clustering, missing peaks will query the raw data for any replicates missing within a given cluster due to low intensity or false negative detection errors. The m/z and retention time of the average peptide clusters are used as a starting point in searching the raw data of the missing peptide. By using the time normalisation function, adjustment of target time is performed to efficiently locate the coordinates of missing peptide. Peak apex located within  $\pm 0.035$  Th and  $\pm 1$  min of the target peptide coordinates is then considered. The RSD value of the retrieved peak must be within typically  $\pm 25\%$  of the average cluster intensity to be considered. In 2D LC-MS data, clustering is performed across salt fractions to combine the intensities of the same peptide found over adjacent fractions (typically  $\pm 2$ ). Differentially abundant peptides were selected on the basis of their statistical significance ( $p \leq 0.05$  using a paired t-test) and reproducibility of the control to challenge peptide-intensity ratio (at least 2-fold in 2 out of 3 replicate runs). The data generated by the clustering program and the peptide maps are available as Excel .csv file and can be included in downstream programs for further analysis. Peptide ions of interest were manually validated using the validation module that enables the verification of all ions assigned to a specific peptide cluster.

## 2. PHP script for MHC class I peptide selection

```
function isMHCpeptide($pepseq) {
    $peplength = strlen($pepseq);
    $poslast = substr($pepseq, $peplength -1, 1);
    if ($peplength >= 8 && $peplength <= 9) {
        $pos3 = substr($pepseq, 2, 1);
        $pos5 = substr($pepseq, 4, 1);
        $pos7 = substr($pepseq, 6, 1);
        if (preg_match('/[ILVMF]/', $poslast) && ((preg_match('/[YF]/', $pos3) && $peplength == 8) ||
preg_match('/[YF]/', $pos5) ||
(preg_match('/[H]/', $pos7) && $peplength == 9) || (preg_match('/[N]/', $pos5) && $peplength
== 9))) {
            return 1;
        } else
        if ($peplength == 9 && preg_match('/LLL$/', $pepseq)) {
            return 1;
        }
        } else
        if ($peplength >= 10 && $peplength <= 13) {
            $pos5 = substr($pepseq, 4, 1);
            if (preg_match('/[N]/', $pos5) && preg_match('/[ILVMF]/', $poslast)) {
                return 1;
            }
        }
        return 0;
    }
}
```

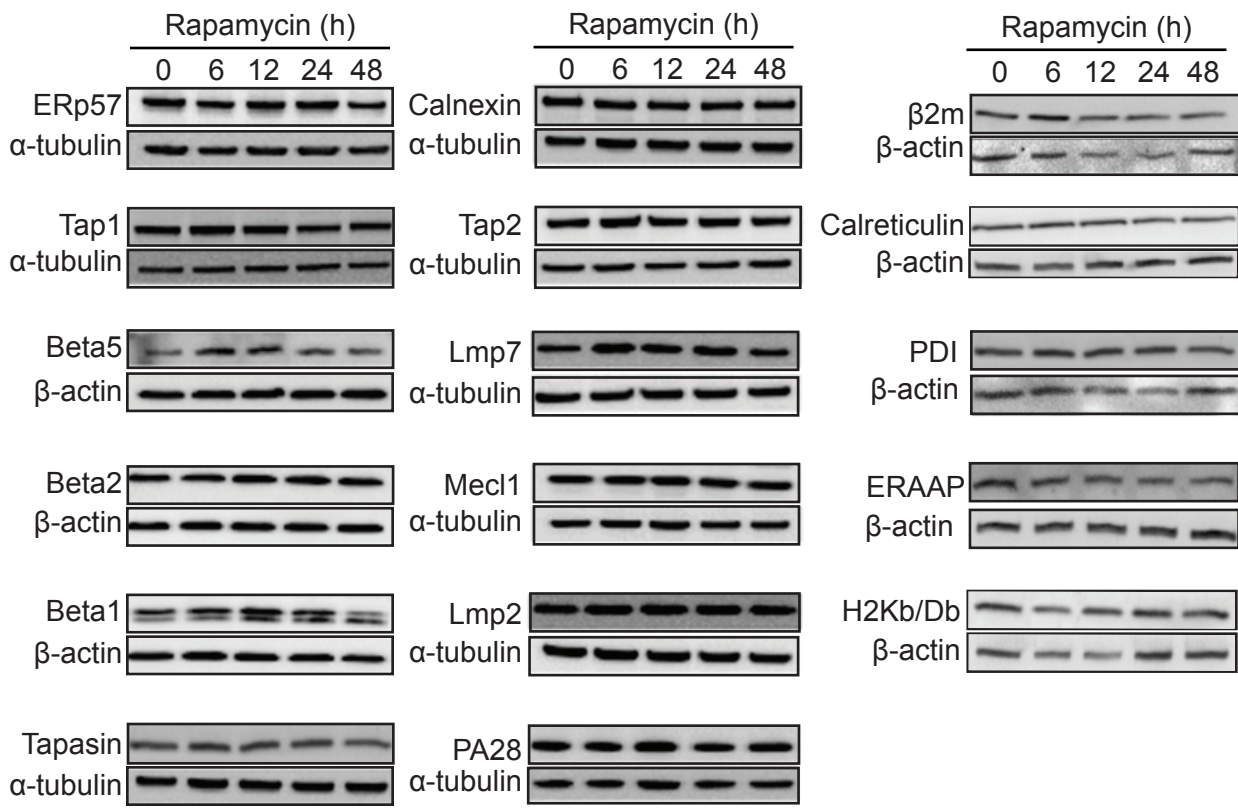

W.B.

**Figure S1.** Rapamycin does not affect levels of proteins involved in the antigen processing and presentation pathway (Jensen *et al.*, 2007). Levels of the indicated proteins were determined by western blotting.  $\beta$ -actin and  $\alpha$ -tubulin served as loading controls. Data are representative of three independent experiments.

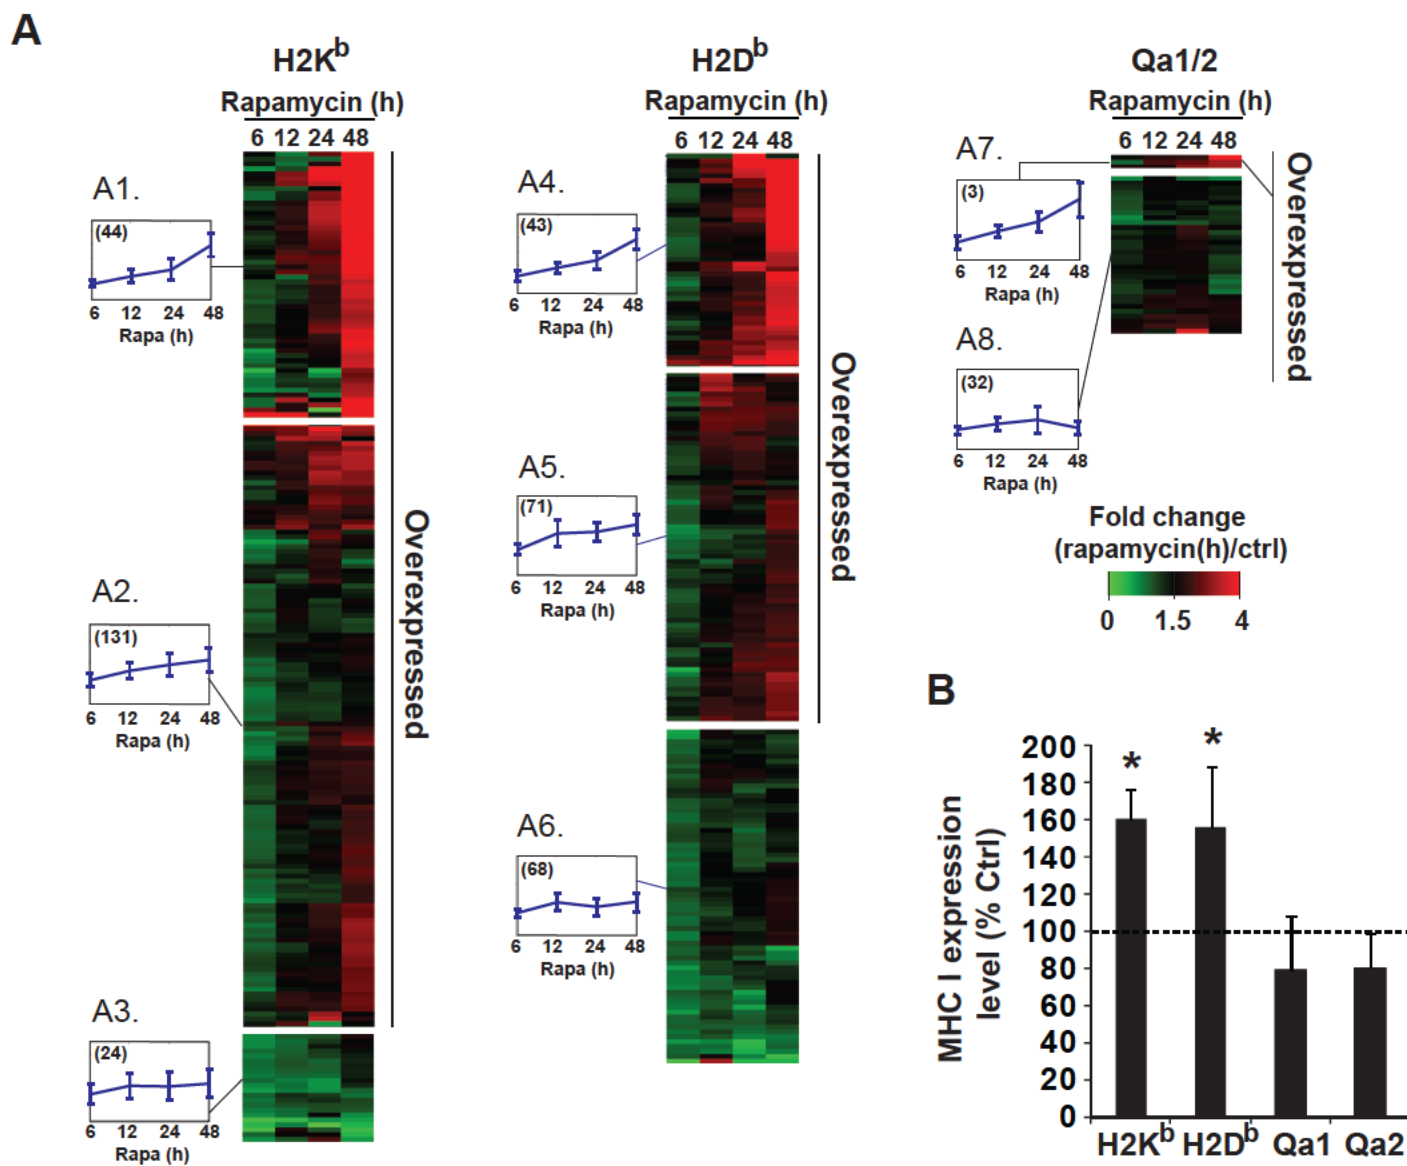

**Figure S2.** Rapamycin increases the abundance of MIPs presented by MHC Ia molecules. **(A)** Representation of unsupervised hierarchical clustering of 416 MIPs detected and quantified at different time points. 6 MIPs were detected exclusively after 48h of rapamycin treatment and were not included in the clustering analysis. MIPs are represented vertically, and experimental conditions (i.e., rapamycin time course) are displayed horizontally. Clusters for H2K<sup>b</sup>, H2D<sup>b</sup>, and Qa1/2-associated peptides are shown with the mean temporal profile in A1-A8. The number of MIPs per cluster is indicated in parenthesis. Clusters A1,2,4,5 and 7 show MIPs that were progressively overexpressed upon rapamycin treatment. **(B)** Cell surface expression of MHC I allelic products was evaluated by flow cytometry after 48h of rapamycin treatment. Histogram shows the rapamycin/ctrl mean fluorescence intensity ratio for H2K<sup>b</sup>, H2D<sup>b</sup>, Qa1, and Qa2. (n=6, \**P* < 0.005, Student *t*-test).

**A**

| Gene symbol | Cell cycle/proliferation | Proteasome | Protein complex assembly | Protein transport | DNA replication | Transcription |
|-------------|--------------------------|------------|--------------------------|-------------------|-----------------|---------------|
| Ankrd26     |                          |            |                          |                   |                 | ■             |
| Ap2a1       |                          |            | ■                        | ■                 |                 |               |
| Ap2a2       |                          |            | ■                        | ■                 |                 |               |
| Ash1l       |                          |            |                          |                   |                 | ■             |
| BC066107    |                          |            |                          |                   |                 | ■             |
| Bptf        |                          |            |                          |                   |                 | ■             |
| Bub1b       | ■                        |            |                          |                   |                 |               |
| Ccnf        | ■                        |            |                          |                   |                 |               |
| Chaf1b      |                          |            |                          |                   | ■               | ■             |
| Copb1       |                          |            | ■                        | ■                 |                 |               |
| Dlg7        | ■                        |            |                          |                   |                 |               |
| Dtl         |                          |            |                          |                   | ■               |               |
| ErbB2ip     |                          |            |                          | ■                 |                 |               |
| Foxj3       |                          |            |                          |                   |                 | ■             |
| Hivep2      |                          |            |                          |                   |                 | ■             |
| Mnat1       |                          |            |                          |                   |                 | ■             |
| Mphosph1    | ■                        |            |                          | ■                 |                 |               |
| Myb         |                          |            |                          |                   |                 | ■             |
| Plagl2      |                          |            |                          |                   |                 | ■             |
| Psma3       |                          | ■          |                          |                   |                 |               |
| Psmb8       |                          | ■          |                          |                   |                 |               |
| Psmb9       |                          | ■          |                          |                   |                 |               |
| Psmc2       | ■                        | ■          |                          |                   |                 |               |
| Ptpn11      | ■                        |            |                          | ■                 |                 |               |
| Rcc2        | ■                        |            |                          |                   |                 |               |
| Rfc2        |                          |            |                          |                   | ■               |               |
| Sec24c      |                          |            |                          | ■                 |                 |               |
| Slc12a6     | ■                        |            |                          |                   |                 |               |
| Supt16h     |                          |            |                          |                   | ■               | ■             |
| Taf6        |                          |            |                          |                   |                 | ■             |
| Tfdp2       | ■                        |            |                          |                   |                 | ■             |
| Tmod1       |                          |            | ■                        |                   |                 |               |
| Vps33a      |                          |            |                          | ■                 |                 |               |
| Yif1a       |                          |            |                          | ■                 |                 |               |
| Zfp157      |                          |            |                          |                   |                 | ■             |
| Zfp273      |                          |            |                          |                   |                 | ■             |
| Zfp62       |                          |            |                          |                   |                 | ■             |
| Znrd1       |                          |            |                          |                   |                 | ■             |

**Figure S3.** Cellular processes enriched in the DEM source genes or the DEGs. **(A)** Representation of 38 genes encoding DEMs (rows) in 6 cellular processes (columns) that were enriched in the GO analysis. See also Supplementary Table S2.

**B**

| Gene symbol | Unfolded protein response | ER-nucleus signaling | Signal transduction (small GTPase) | Phospholipid metabolic process | Reg. of kinase activity | Protein transport | Apoptosis |
|-------------|---------------------------|----------------------|------------------------------------|--------------------------------|-------------------------|-------------------|-----------|
| Agpat4      |                           |                      |                                    |                                |                         |                   |           |
| Agpat9      |                           |                      |                                    |                                |                         |                   |           |
| Akap13      |                           |                      |                                    |                                |                         |                   |           |
| Ap3m2       |                           |                      |                                    |                                |                         |                   |           |
| Arf2        |                           |                      |                                    |                                |                         |                   |           |
| Arfgap3     |                           |                      |                                    |                                |                         |                   |           |
| Arhgef10    |                           |                      |                                    |                                |                         |                   |           |
| Arl4a       |                           |                      |                                    |                                |                         |                   |           |
| Arl9        |                           |                      |                                    |                                |                         |                   |           |
| Atf5        |                           |                      |                                    |                                |                         |                   |           |
| Avpl1       |                           |                      |                                    |                                |                         |                   |           |
| Bcl2l11     |                           |                      |                                    |                                |                         |                   |           |
| Bmf         |                           |                      |                                    |                                |                         |                   |           |
| Card6       |                           |                      |                                    |                                |                         |                   |           |
| Casp4       |                           |                      |                                    |                                |                         |                   |           |
| Cdkn1a      |                           |                      |                                    |                                |                         |                   |           |
| Cebpg       |                           |                      |                                    |                                |                         |                   |           |
| Cept1       |                           |                      |                                    |                                |                         |                   |           |
| Derl2       |                           |                      |                                    |                                |                         |                   |           |
| Dgka        |                           |                      |                                    |                                |                         |                   |           |
| Dusp16      |                           |                      |                                    |                                |                         |                   |           |
| Ero1l       |                           |                      |                                    |                                |                         |                   |           |
| Evi5l       |                           |                      |                                    |                                |                         |                   |           |
| Exoc4       |                           |                      |                                    |                                |                         |                   |           |
| Fas         |                           |                      |                                    |                                |                         |                   |           |
| Fcer1g      |                           |                      |                                    |                                |                         |                   |           |
| Fgd6        |                           |                      |                                    |                                |                         |                   |           |
| Gadd45a     |                           |                      |                                    |                                |                         |                   |           |
| Gadd45g     |                           |                      |                                    |                                |                         |                   |           |
| Gla         |                           |                      |                                    |                                |                         |                   |           |
| Gng3        |                           |                      |                                    |                                |                         |                   |           |
| Gsk3b       |                           |                      |                                    |                                |                         |                   |           |

| Gene symbol | Unfolded protein response | ER-nucleus signaling | Signal transduction (small GTPase) | Phospholipid metabolic process | Reg. of kinase activity | Protein transport | Apoptosis |
|-------------|---------------------------|----------------------|------------------------------------|--------------------------------|-------------------------|-------------------|-----------|
| H47         |                           |                      |                                    |                                |                         |                   |           |
| Ifng        |                           |                      |                                    |                                |                         |                   |           |
| Ihpk2       |                           |                      |                                    |                                |                         |                   |           |
| Ikbib       |                           |                      |                                    |                                |                         |                   |           |
| Irak2       |                           |                      |                                    |                                |                         |                   |           |
| Ire1        |                           |                      |                                    |                                |                         |                   |           |
| Jak2        |                           |                      |                                    |                                |                         |                   |           |
| Kdelr3      |                           |                      |                                    |                                |                         |                   |           |
| Kras        |                           |                      |                                    |                                |                         |                   |           |
| Litaf       |                           |                      |                                    |                                |                         |                   |           |
| Lyst        |                           |                      |                                    |                                |                         |                   |           |
| Mcf2        |                           |                      |                                    |                                |                         |                   |           |
| Mxra8       |                           |                      |                                    |                                |                         |                   |           |
| Neb         |                           |                      |                                    |                                |                         |                   |           |
| Nisch       |                           |                      |                                    |                                |                         |                   |           |
| Nme5        |                           |                      |                                    |                                |                         |                   |           |
| Nr4a1       |                           |                      |                                    |                                |                         |                   |           |
| Optn        |                           |                      |                                    |                                |                         |                   |           |
| Pcyt1b      |                           |                      |                                    |                                |                         |                   |           |
| Pex26       |                           |                      |                                    |                                |                         |                   |           |
| Pgap1       |                           |                      |                                    |                                |                         |                   |           |
| Pign        |                           |                      |                                    |                                |                         |                   |           |
| Pigv        |                           |                      |                                    |                                |                         |                   |           |
| Pip5k1b     |                           |                      |                                    |                                |                         |                   |           |
| Plekhf1     |                           |                      |                                    |                                |                         |                   |           |
| Pmaip1      |                           |                      |                                    |                                |                         |                   |           |
| Rab28       |                           |                      |                                    |                                |                         |                   |           |
| Rab3d       |                           |                      |                                    |                                |                         |                   |           |
| Rab6        |                           |                      |                                    |                                |                         |                   |           |
| Rabl3       |                           |                      |                                    |                                |                         |                   |           |
| Rap2a       |                           |                      |                                    |                                |                         |                   |           |
| Rarg        |                           |                      |                                    |                                |                         |                   |           |
| Rasa4       |                           |                      |                                    |                                |                         |                   |           |

| Gene symbol | Unfolded protein response | ER-nucleus signaling | Signal transduction (small GTPase) | Phospholipid metabolic process | Reg. of kinase activity | Protein transport | Apoptosis |
|-------------|---------------------------|----------------------|------------------------------------|--------------------------------|-------------------------|-------------------|-----------|
| Rassf1      |                           |                      |                                    |                                |                         |                   |           |
| Rerg        |                           |                      |                                    |                                |                         |                   |           |
| Rhoc        |                           |                      |                                    |                                |                         |                   |           |
| Rhou        |                           |                      |                                    |                                |                         |                   |           |
| Rit1        |                           |                      |                                    |                                |                         |                   |           |
| Rnf13       |                           |                      |                                    |                                |                         |                   |           |
| Rrad        |                           |                      |                                    |                                |                         |                   |           |
| Rras        |                           |                      |                                    |                                |                         |                   |           |
| Samd8       |                           |                      |                                    |                                |                         |                   |           |
| Sec24d      |                           |                      |                                    |                                |                         |                   |           |
| Sema6a      |                           |                      |                                    |                                |                         |                   |           |
| Sft2d2      |                           |                      |                                    |                                |                         |                   |           |
| Sipa1l2     |                           |                      |                                    |                                |                         |                   |           |
| Slc25a14    |                           |                      |                                    |                                |                         |                   |           |
| Slc25a36    |                           |                      |                                    |                                |                         |                   |           |
| Smpd1       |                           |                      |                                    |                                |                         |                   |           |
| Snap23      |                           |                      |                                    |                                |                         |                   |           |
| Spred3      |                           |                      |                                    |                                |                         |                   |           |
| Stk38l      |                           |                      |                                    |                                |                         |                   |           |
| Stx11       |                           |                      |                                    |                                |                         |                   |           |
| Stx1a       |                           |                      |                                    |                                |                         |                   |           |
| Syt1l       |                           |                      |                                    |                                |                         |                   |           |
| Syt12       |                           |                      |                                    |                                |                         |                   |           |
| Syt13       |                           |                      |                                    |                                |                         |                   |           |
| Tigd2       |                           |                      |                                    |                                |                         |                   |           |
| Tmem81      |                           |                      |                                    |                                |                         |                   |           |
| Tnfrsf1b    |                           |                      |                                    |                                |                         |                   |           |
| Traf2       |                           |                      |                                    |                                |                         |                   |           |
| Trib3       |                           |                      |                                    |                                |                         |                   |           |
| Tsc22d3     |                           |                      |                                    |                                |                         |                   |           |
| Tubb6       |                           |                      |                                    |                                |                         |                   |           |
| Ube2z       |                           |                      |                                    |                                |                         |                   |           |
| Vps45       |                           |                      |                                    |                                |                         |                   |           |
| Wdr19       |                           |                      |                                    |                                |                         |                   |           |
| Wdr67       |                           |                      |                                    |                                |                         |                   |           |
| Zfyve16     |                           |                      |                                    |                                |                         |                   |           |

**Figure S3 continued.** Cellular processes enriched in the DEM source genes or the DEGs. **(B)** Representation of 101 underexpressed genes (rows) in 7 cellular processes (columns) that were enriched in the GO analysis. See also Supplementary Table S2.



C

| Gene symbol | Cell cycle/proliferation | Cell growth | Translation | Lipid biosynthesis | Nucleotide biosynthesis | rRNA processing | DNA replication | Transcription |
|-------------|--------------------------|-------------|-------------|--------------------|-------------------------|-----------------|-----------------|---------------|
| Aacs        |                          |             |             |                    |                         |                 |                 |               |
| Angptl4     |                          |             |             |                    |                         |                 |                 |               |
| Aven        |                          |             |             |                    |                         |                 |                 |               |
| Ayt12       |                          |             |             |                    |                         |                 |                 |               |
| B4galt6     |                          |             |             |                    |                         |                 |                 |               |
| Bop1        |                          |             |             |                    |                         |                 |                 |               |
| Cspg5       |                          |             |             |                    |                         |                 |                 |               |
| Dhcr24      |                          |             |             |                    |                         |                 |                 |               |
| Dhcr7       |                          |             |             |                    |                         |                 |                 |               |
| Dhodh       |                          |             |             |                    |                         |                 |                 |               |
| Dlx1        |                          |             |             |                    |                         |                 |                 |               |
| Dna2l       |                          |             |             |                    |                         |                 |                 |               |
| E2f3        |                          |             |             |                    |                         |                 |                 |               |
| Ebna1bp2    |                          |             |             |                    |                         |                 |                 |               |
| Ecgf1       |                          |             |             |                    |                         |                 |                 |               |
| Eef1e1      |                          |             |             |                    |                         |                 |                 |               |
| Eftud2      |                          |             |             |                    |                         |                 |                 |               |
| Eif3s9      |                          |             |             |                    |                         |                 |                 |               |
| Eif4a2      |                          |             |             |                    |                         |                 |                 |               |
| Etv5        |                          |             |             |                    |                         |                 |                 |               |
| Exosc6      |                          |             |             |                    |                         |                 |                 |               |
| Fabp5       |                          |             |             |                    |                         |                 |                 |               |
| Fasn        |                          |             |             |                    |                         |                 |                 |               |
| Hmgcr       |                          |             |             |                    |                         |                 |                 |               |
| Hmgcs1      |                          |             |             |                    |                         |                 |                 |               |
| Hnrpab      |                          |             |             |                    |                         |                 |                 |               |
| Hsd17b7     |                          |             |             |                    |                         |                 |                 |               |
| Idi1        |                          |             |             |                    |                         |                 |                 |               |
| Kcnma1      |                          |             |             |                    |                         |                 |                 |               |
| Lama5       |                          |             |             |                    |                         |                 |                 |               |
| Ldlr        |                          |             |             |                    |                         |                 |                 |               |
| Lef1        |                          |             |             |                    |                         |                 |                 |               |
| Mcm2        |                          |             |             |                    |                         |                 |                 |               |

| Gene symbol | Cell cycle/proliferation | Cell growth | Translation | Lipid biosynthesis | Nucleotide biosynthesis | rRNA processing | DNA replication | Transcription |
|-------------|--------------------------|-------------|-------------|--------------------|-------------------------|-----------------|-----------------|---------------|
| Mcm6        |                          |             |             |                    |                         |                 |                 |               |
| Mknk2       |                          |             |             |                    |                         |                 |                 |               |
| Mrp12       |                          |             |             |                    |                         |                 |                 |               |
| Mvd         |                          |             |             |                    |                         |                 |                 |               |
| Myc         |                          |             |             |                    |                         |                 |                 |               |
| Nasp        |                          |             |             |                    |                         |                 |                 |               |
| Nfix        |                          |             |             |                    |                         |                 |                 |               |
| Nsdhl       |                          |             |             |                    |                         |                 |                 |               |
| Oprs1       |                          |             |             |                    |                         |                 |                 |               |
| Orc1l       |                          |             |             |                    |                         |                 |                 |               |
| Pcyt2       |                          |             |             |                    |                         |                 |                 |               |
| Phb         |                          |             |             |                    |                         |                 |                 |               |
| Pole2       |                          |             |             |                    |                         |                 |                 |               |
| Ppan        |                          |             |             |                    |                         |                 |                 |               |
| Ppargc1b    |                          |             |             |                    |                         |                 |                 |               |
| Rara        |                          |             |             |                    |                         |                 |                 |               |
| Rasgrp2     |                          |             |             |                    |                         |                 |                 |               |
| Rnu3ip2     |                          |             |             |                    |                         |                 |                 |               |
| Rpl10a      |                          |             |             |                    |                         |                 |                 |               |
| Rps13       |                          |             |             |                    |                         |                 |                 |               |
| Rps15a      |                          |             |             |                    |                         |                 |                 |               |
| Rpsa        |                          |             |             |                    |                         |                 |                 |               |
| Rrp1b       |                          |             |             |                    |                         |                 |                 |               |
| Ruvbl1      |                          |             |             |                    |                         |                 |                 |               |
| Sfn         |                          |             |             |                    |                         |                 |                 |               |
| Smarcc1     |                          |             |             |                    |                         |                 |                 |               |
| Socs1       |                          |             |             |                    |                         |                 |                 |               |
| Sod2        |                          |             |             |                    |                         |                 |                 |               |
| Sox2        |                          |             |             |                    |                         |                 |                 |               |
| Spn         |                          |             |             |                    |                         |                 |                 |               |
| Thrap3      |                          |             |             |                    |                         |                 |                 |               |
| Tnf         |                          |             |             |                    |                         |                 |                 |               |
| Tnfrsf7     |                          |             |             |                    |                         |                 |                 |               |
| Tykl        |                          |             |             |                    |                         |                 |                 |               |
| Umps        |                          |             |             |                    |                         |                 |                 |               |
| Utp14b      |                          |             |             |                    |                         |                 |                 |               |
| Wdr46       |                          |             |             |                    |                         |                 |                 |               |

**Figure S3 continued.** Cellular processes enriched in the DEM source genes or the DEGs. (C) Representation of 70 overexpressed genes (rows) in 8 functional classes (columns) that were enriched in the GO analysis. See also Supplementary Table S2.

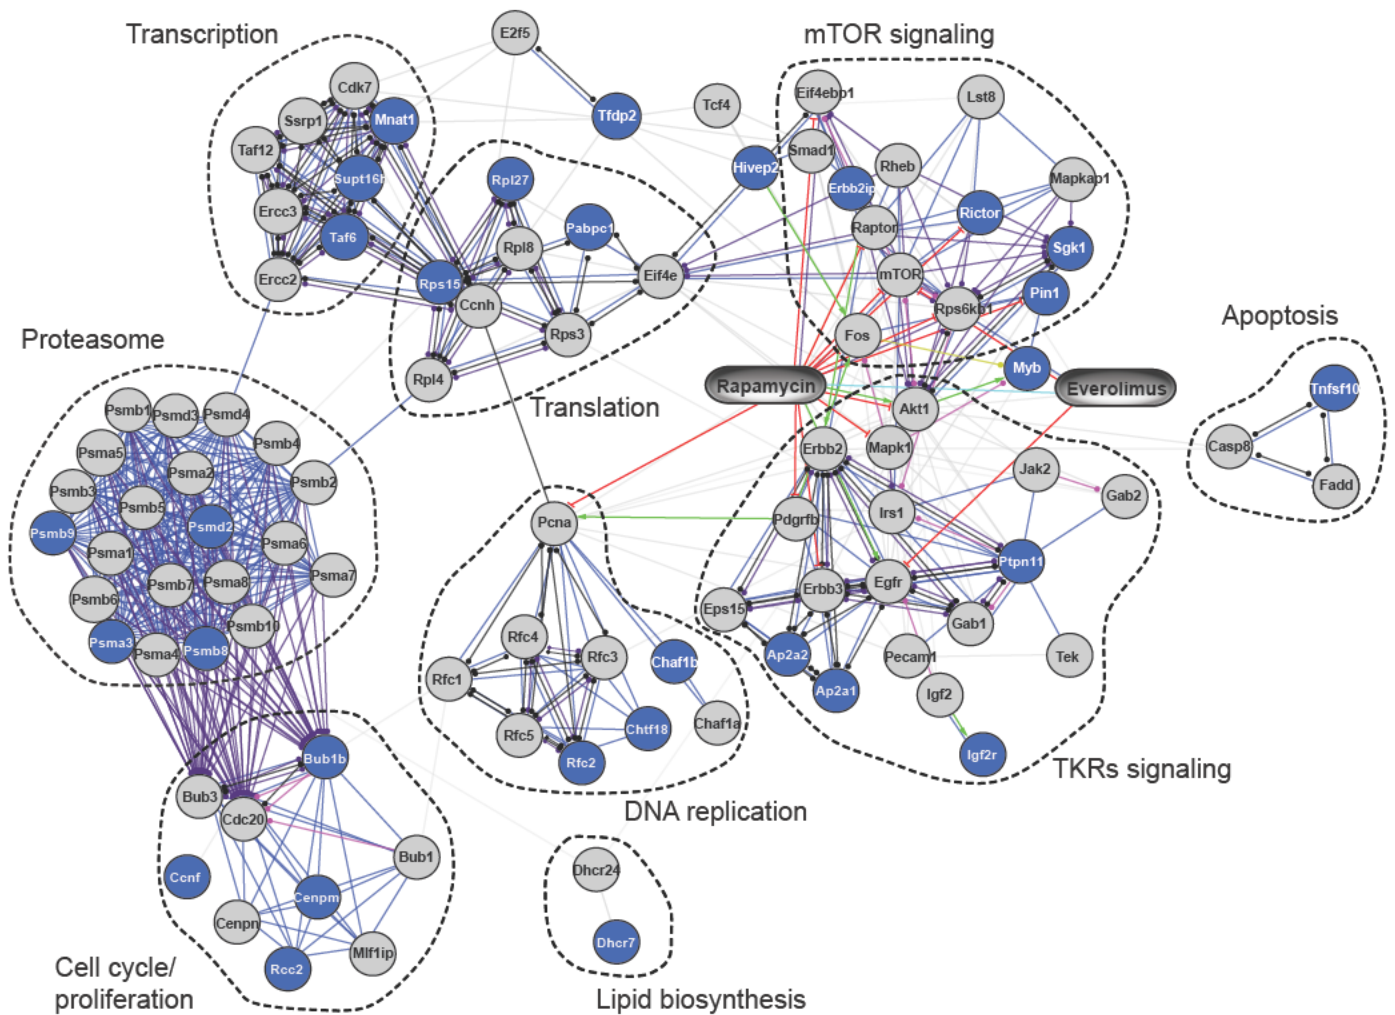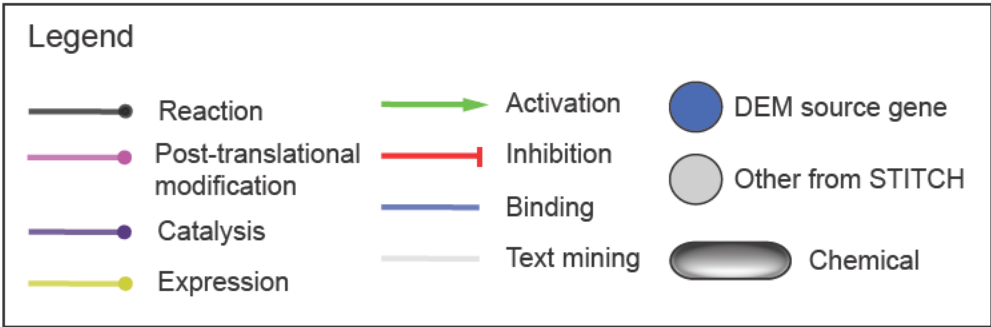

**Figure S4.** DEM source genes are involved in cellular processes and signaling events governed by the mTOR network. Source genes encoding DEMs were analyzed with the STITCH database (<http://stitch.embl.de/>) and the network was elucidated based upon protein-protein interactions, protein-chemical associations, and functional associations. The emerging network elucidates a total of 30 DEM source genes distributed within different subnetworks, such as apoptosis, cell cycle/proliferation, DNA replication, lipid biosynthesis, proteasome, transcription, translation, mTOR signaling and tyrosine kinase receptors (TKRs) signaling. Rapamycin and everolimus (rapamycin analog) are the 2 unique chemicals that were revealed in the network. Symbols and arrows in the network are illustrated in the legend.

**A**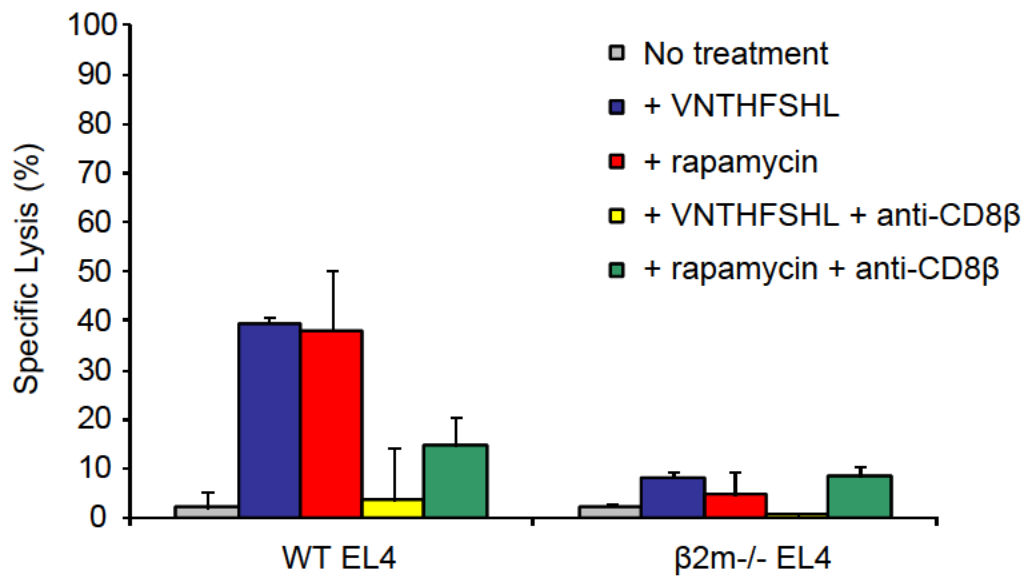**B**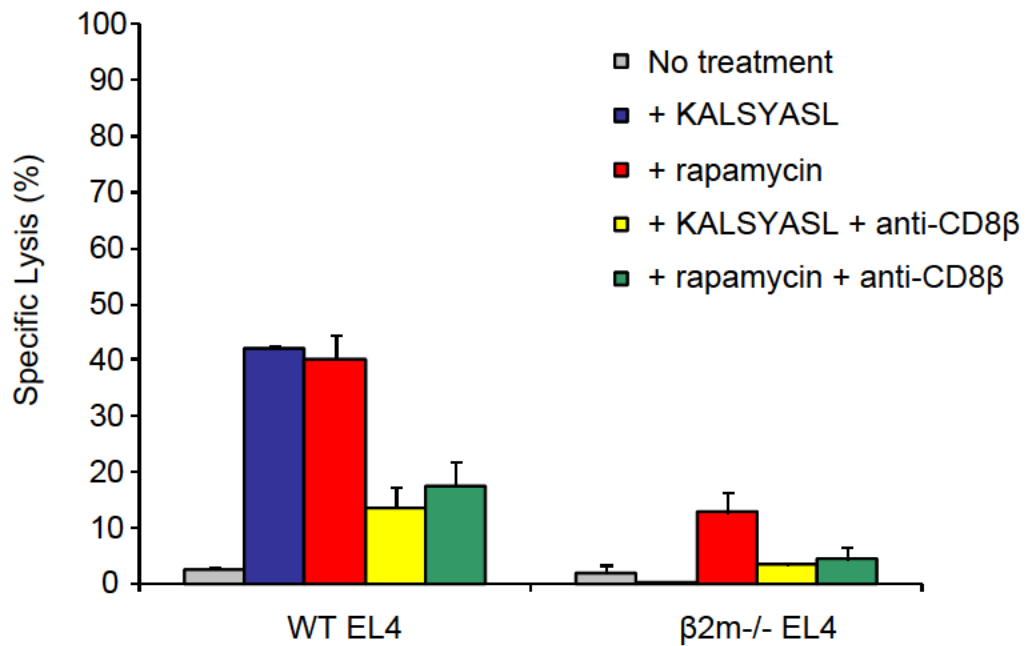

**Figure S5.** Cytotoxic activity against VNTHFSHL and KALSYASL is MHC-I restricted. Specific lysis against wild-type and  $\beta 2$ -microglobulin deficient CFSE-labeled EL4 cells (Fortier *et al.*, 2008) was estimated as in figure 7 at E:T ratio of 200:1 in the presence or absence of 5mg/ml of anti-CD8 $\beta$  antibody (clone H35-17.2). Data represent the mean  $\pm$  SD for three mice per group.

**Table S3.** GO terms enriched in DEM source genes and DEGs. DAVID bioinformatics resources (<http://david.abcc.ncifcrf.gov/>) were used to identify enriched biological processes ( $P < 0.05$ ) associated to DEGs and to genes coding for DEMs. Functionally related GO terms were annotated within unique cellular processes (last column). Biological processes enriched in DEM source genes are highlighted in blue. Biological processes enriched in over- and underexpressed mRNAs are highlighted in red and green, respectively.

|                                                             | GO term                                             | GO number  | Genes in sample | p value                   | Gene symbol                                                                                                                          | Cellular processes in Figure 3 and Supplementary Figure S3 |
|-------------------------------------------------------------|-----------------------------------------------------|------------|-----------------|---------------------------|--------------------------------------------------------------------------------------------------------------------------------------|------------------------------------------------------------|
| Biological processes enriched in DEM source genes           | Regulation of progression through cell cycle        | GO:0000074 | 7               | 0.007                     | Bub1b, Ccnf, Ptpn11, Psmd2, Slc12a6, Tfdp2, Dlg7                                                                                     | Cell cycle/proliferation                                   |
|                                                             | M phase of mitotic cell cycle                       | GO:0000087 | 5               | 0.012                     | Bub1b, Ccnf, Rcc2, Dlg7, Mphosph1                                                                                                    |                                                            |
|                                                             | DNA replication                                     | GO:0006260 | 4               | 0.044                     | Rfc2, Dtl, Chaf1b, Supt16h                                                                                                           | DNA replication                                            |
|                                                             | Transcription, DNA-dependent                        | GO:0006351 | 17              | 0.042                     | Hivep2, Mnat1, Myb, Taf6, Zfp62, Plagl2, Znr1, Zfp157, Chaf1b, Supt16h, Ash11, Bptf, Tfdp2, Zfp273, Foxj3, Ankr26, BC066107          | Transcription                                              |
|                                                             | Regulation of transcription, DNA-dependent          | GO:0006355 | 17              | 0.038                     | Hivep2, Mnat1, Myb, Taf6, Zfp62, Plagl2, Znr1, Zfp157, Chaf1b, Supt16h, Ash11, Bptf, Tfdp2, Zfp273, Foxj3, Ankr26, BC066107          |                                                            |
|                                                             | Protein complex assembly                            | GO:0006461 | 4               | 0.047                     | Ap2a1, Ap2a2, Tmod1, Copb1                                                                                                           | Protein complex assembly                                   |
|                                                             | Intracellular transport                             | GO:0046907 | 8               | 0.048                     | Ptpn11, Erbb2ip, Sec24c, Mphosph1, Ap2a1, Ap2a2, Yif1a, Copb1                                                                        | Protein transport                                          |
|                                                             | Protein transport                                   | GO:0015031 | 8               | 0.043                     | Ptpn11, Erbb2ip, Sec24c, Vps33a, Ap2a1, Ap2a2, Yif1a, Copb1                                                                          |                                                            |
| Proteasome complex                                          | GO:0000502                                          | 4          | 0.011           | Psm3, Psmb8, Psmb9, Psmd2 | Proteasome                                                                                                                           |                                                            |
| Biological processes enriched in DEGs (overexpressed mRNAs) | Translation                                         | GO:0006412 | 15              | 0.012                     | Lama5, Rpl10a, Eif3s9, Mknk2, Wdr46, Rpsa, Eif4a2, Rps15a, Mrpl12, Eftud2, Tnf, Eef1e1, Spn, Tnfrsf7, Rps13                          | Translation                                                |
|                                                             | DNA replication                                     | GO:0006260 | 8               | 0.010                     | Pole2, Mcm2, Mcm6, Dna2l, Nfix, Orc11, Phb, Nasp                                                                                     | DNA replication                                            |
|                                                             | Positive regulation of cellular metabolic process   | GO:0031325 | 19              | 0.037                     | E2f3, Lef1, Ppargc1b, Smarcc1, Etv5, Hnrpab, Thrap3, Tnf, Tnfrsf7, Rara, Spn, Sox2, Myc, Dhcr24, Aven, Sod2, Tnfrsf7, Dlx1, Angptl4  | Cell cycle/proliferation                                   |
|                                                             | Steroid biosynthetic process                        | GO:0006694 | 9               | 0.00001                   | Dhcr7, Dhcr24, Hmgcr, Idi1, Oprs1, Hsd17b7, Mvd, Nsdhl, Hmgcs1                                                                       | Lipid biosynthesis (sterol)                                |
|                                                             | Steroid metabolic process                           | GO:0008202 | 11              | 0.00006                   | Kenma1, Ldlr, Dhcr7, Dhcr24, Hmgcr, Idi1, Oprs1, Hsd17b7, Mvd, Nsdhl, Hmgcs1                                                         |                                                            |
|                                                             | Cholesterol metabolic process                       | GO:0008203 | 9               | 0.00001                   | Dhcr7, Hmgcr, Hsd17b7, Ldlr, Nsdhl, Dhcr24, Mvd, Hmgcs1, Idi1                                                                        |                                                            |
|                                                             | Lipid biosynthetic process                          | GO:0008610 | 15              | 0.00001                   | Dhcr7, Fasn, Hmgcr, Hsd17b7, Fabp5, Nsdhl, Oprs1, B4galt6, Pcyt2, Dhcr24, Aacs, Mvd, Hmgcs1, Ayt12, Idi1                             |                                                            |
|                                                             | Sterol metabolic process                            | GO:0016125 | 10              | 0.000001                  | Dhcr7, Hmgcr, Hsd17b7, Ldlr, Nsdhl, Oprs1, Dhcr24, Mvd, Hmgcs1, Idi1                                                                 |                                                            |
|                                                             | Sterol biosynthetic process                         | GO:0016126 | 9               | 0.0000001                 | Dhcr7, Hmgcr, Hsd17b7, Nsdhl, Oprs1, Dhcr24, Mvd, Hmgcs1, Idi1                                                                       |                                                            |
|                                                             | rRNA processing                                     | GO:0006364 | 6               | 0.001                     | Rrp1b, Exosc6, Utp14b, Bop1, Rnu3ip2, Ebna1bp2                                                                                       | rRNA processing                                            |
|                                                             | RNA processing                                      | GO:0006396 | 17              | 0.0001                    | Sf3b3, Rrp1b, Ppih, 6720458F09Rik, Syncrip, Hnrpab, Magoh, Bop1, Rnu3ip2, Ddx54, Pusi1, Lsm7, Exosc6, Eftud2, Utp14b, Lsm2, Ebna1bp2 | Transcription                                              |
|                                                             | Positive regulation of transcription, DNA-dependent | GO:0045893 | 9               | 0.043                     | E2f3, Hnrpab, Lef1, Rara, Smarcc1, Eftud2, Tnf, Ppargc1b, Thrap3                                                                     |                                                            |
|                                                             | Positive regulation of transcription                | GO:0045941 | 10              | 0.047                     | Etv5, E2f3, Hnrpab, Lef1, Rara, Smarcc1, Eftud2, Tnf, Ppargc1b, Thrap3                                                               |                                                            |

|                                            |            |   |       |                                                |                         |
|--------------------------------------------|------------|---|-------|------------------------------------------------|-------------------------|
| Pyrimidine base metabolic process          | GO:0006206 | 3 | 0.008 | Dhodh, Ecgf1, Umps                             | Nucleotide biosynthesis |
| Pyrimidine nucleotide biosynthetic process | GO:0006221 | 4 | 0.003 | Tyki, Dhodh, Ecgf1, Umps                       |                         |
| Nucleobase metabolic process               | GO:0009112 | 3 | 0.026 | Dhodh, Ecgf1, Umps                             |                         |
| Regulation of cell size                    | GO:0008361 | 6 | 0.044 | Cspg5, Sfn, Ruvbl1, Socs1, Rasgrp2, Ppan       | Cell growth             |
| Regulation of cell growth                  | GO:0001558 | 6 | 0.015 | Cspg5, Sfn, Ruvbl1, Socs1, Rasgrp2, Ppan       |                         |
| rRNA metabolic process                     | GO:0016072 | 6 | 0.001 | Ebna1bp2, Rrp1b, Exosc6, Utp14b, Bop1, Rnu3ip2 | rRNA processing         |

|                                                              |                                              |            |       |                                                                                 |                                                                                                                                                                                                                                                                          |                                    |
|--------------------------------------------------------------|----------------------------------------------|------------|-------|---------------------------------------------------------------------------------|--------------------------------------------------------------------------------------------------------------------------------------------------------------------------------------------------------------------------------------------------------------------------|------------------------------------|
| Biological processes enriched in DEGs (underexpressed mRNAs) | Apoptosis                                    | GO:0006915 | 29    | 0.038                                                                           | 1200009F10Rik, Atf5, Bcl2l11, Bmf, Card6, Casp4, Cdkn1a, Cebpg, Ern1, Fas, Fcer1g, Gadd45g, Gsk3b, Ifng, Ihpk2, Irak2, Jak2, Kras, Litaf, Nme5, Nr4a1, Plekhf1, Pmaip1, Rarg, Sema6a, Traf2, Trib3, Tsc22d3, Ube2z                                                       | Apoptosis                          |
|                                                              | Cell death                                   | GO:0008219 | 30    | 0.044                                                                           | 1200009F10Rik, Atf5, Bcl2l11, Bmf, Card6, Casp4, Cdkn1a, Cebpg, Ern1, Fas, Fcer1g, Gadd45g, Gsk3b, Ifng, Ihpk2, Irak2, Jak2, Kras, Litaf, Nme5, Nr4a1, Plekhf1, Pmaip1, Rarg, Sema6a, Tnfrsf1b, Traf2,                                                                   |                                    |
|                                                              | Regulation of apoptosis                      | GO:0042981 | 22    | 0.025                                                                           | Bcl2l11, Casp4, Cdkn1a, Cebpg, Fas, Fcer1g, Tsc22d3, Nr4a1, Kras, Rarg, Traf2, Gsk3b, Pmaip1, 1200009F10Rik, Plekhf1, Nme5, Ihpk2, Ern1, Atf5, Irak2, Bmf, Card6                                                                                                         |                                    |
|                                                              | Positive regulation of programmed cell death | GO:0043068 | 12    | 0.040                                                                           | Bcl2l11, 1200009F10Rik, Casp4, Cdkn1a, Cebpg, Ern1, Fas, Ihpk2, Nr4a1, Plekhf1, Pmaip1, Rarg                                                                                                                                                                             |                                    |
|                                                              | Intracellular protein transport              | GO:0006886 | 26    | 0.002                                                                           | Ap3m2, Arf2, Arl4a, Jak2, Rab6, Snap23, Stx1a, Rnf13, Gsk3b, Arfgap3, Tigd2, Sec24d, Optn, Pex26, Tmem81, Stx11, Mxra8, Sytl2, Sytl3, Kdelr3, H47, Derl2, Wdr19, Zfyve16, Stk38l, Sytl1                                                                                  | Protein transport                  |
|                                                              | Protein transport                            | GO:0015031 | 37    | 0.004                                                                           | Arf2, Arl4a, Jak2, Lyst, Rab3d, Rab6, Exoc4, Snap23, Stx1a, Vps45, Rnf13, Gsk3b, Ap3m2, Arfgap3, Tigd2, Sec24d, Optn, Pex26, Tmem81, Stx11, Mxra8, Sytl2, Sytl3, Kdelr3, H47, Derl2, Mcd2, Wdr19, Zfyve16, Stk38l, Pgap1, Sytl1, Sft2d2, Rrad, Slc25a14, Slc25a36, Tubb6 |                                    |
|                                                              | Membrane lipid metabolic process             | GO:0006643 | 11    | 0.036                                                                           | A230097K15Rik, Agpat4, Cept1, Neb, Pcyt1b, Pign, Pigv, Pip5k1b, Samd8, Smpd1, Gla                                                                                                                                                                                        | Phospholipid metabolic process     |
|                                                              | Phospholipid metabolic process               | GO:0006644 | 10    | 0.020                                                                           | A230097K15Rik, Agpat4, Cept1, Neb, Pcyt1b, Pign, Pigv, Pip5k1b, Samd8, Smpd1                                                                                                                                                                                             |                                    |
|                                                              | ER-nuclear signaling pathway                 | GO:0006984 | 6     | 0.0005                                                                          | Derl2, Ern1, Ero1l, H47, Ifng, Gsk3b                                                                                                                                                                                                                                     | ER-nucleus signaling               |
|                                                              | Small GTPase mediated signal transduction    | GO:0007264 | 24    | 0.001                                                                           | Akap13, Arf2, Arhgef10, Arl4a, Arl9, Evi5l, Fgd6, Kras, Nisch, Rab28, Rab3d, Rab6, Rabl3, Rap2a, Rasa4, Rassf1, Rerg, Rhoc, Rhou, Rit1, Rrad, Rras, Sipa1l2, Wdr67                                                                                                       | Signal transduction (small GTPase) |
|                                                              | Unfolded protein response                    | GO:0030968 | 5     | 0.001                                                                           | Derl2, Ern1, Ero1l, H47, Ifng                                                                                                                                                                                                                                            | Unfolded protein response          |
| Regulation of kinase activity                                | GO:0043549                                   | 11         | 0.027 | Gadd45g, Gng3, Gadd45a, Trib3, Cdkn1a, Irak2, Spred3, Ern1, Avpi1, Dgka, Dusp16 | Regulation of kinase activity                                                                                                                                                                                                                                            |                                    |

**Table S6.** Relative expression of DEM source genes (blue) at multiple regulatory layers (see also Fig. 3b). Fold change (FC) represents the rapamycin/ctrl abundance ratio. Overexpressed (red) and underexpressed (green):  $P < 0.05$ , no change (grey). n.d.: not determined. (n=3, Student *t*-test).

| Gene symbol | mRNA |         | Normalized polysomal mRNA |         | Protein |         | MIP  |         |
|-------------|------|---------|---------------------------|---------|---------|---------|------|---------|
|             | FC   | p value | FC                        | p value | FC      | p value | FC   | p value |
| Ap2a2       | 0.77 | 0.09    | 0.78                      | 0.17    | n.d.    | n.d.    | 3.39 | 0.007   |
| Ap2a1       | 1.17 | 0.18    | 0.64                      | 0.047   | n.d.    | n.d.    | 2.58 | 0.01    |
| Bptf        | 1.42 | 0.06    | 1.12                      | 0.12    | n.d.    | n.d.    | 4.70 | 0.004   |
| Bub1b       | 1.66 | 0.02    | 0.64                      | 0.002   | n.d.    | n.d.    | 3.62 | 0.05    |
| Ccnf        | 3.07 | 0.01    | 0.92                      | 0.04    | n.d.    | n.d.    | 6.05 | 0.02    |
| Cenpm       | 1.15 | 0.16    | 1.25                      | 0.21    | n.d.    | n.d.    | 3.90 | 0.01    |
| Chaf1b      | 1.71 | 0.01    | 0.66                      | 0.02    | n.d.    | n.d.    | 2.62 | 0.03    |
| Chtf18      | 2.46 | 0.004   | 0.61                      | 0.002   | n.d.    | n.d.    | 4.47 | 0.04    |
| Dhcr7       | 3.74 | 0.01    | 0.75                      | 0.07    | n.d.    | n.d.    | 3.81 | 0.009   |
| Dtl         | 1.47 | 0.048   | 0.80                      | 0.03    | n.d.    | n.d.    | 2.52 | 0.02    |
| ErbB2ip     | 0.95 | 0.83    | 0.81                      | 0.13    | n.d.    | n.d.    | 4.64 | 0.03    |
| Hivep2      | 0.87 | 0.30    | 1.17                      | 0.47    | n.d.    | n.d.    | 2.94 | 0.03    |
| Igf2r       | 1.08 | 0.61    | 1.40                      | 0.67    | n.d.    | n.d.    | 3.18 | 0.002   |
| Mnat1       | 0.65 | 0.04    | 0.79                      | 0.002   | n.d.    | n.d.    | 3.56 | 0.01    |
| Myb         | 1.54 | 0.04    | 0.98                      | 0.08    | 2.16    | 0.01    | 4.34 | 0.01    |
| Nsmaf       | 0.98 | 0.88    | 1.05                      | 0.81    | n.d.    | n.d.    | 3.47 | 0.004   |
| Pabpc1      | 1.25 | 0.06    | 1.77                      | 0.03    | 0.96    | 0.23    | 3.41 | 0.001   |
| Pin1        | 0.92 | 0.08    | 1.21                      | 0.23    | n.d.    | n.d.    | 3.02 | 0.02    |
| Psma3       | 0.89 | 0.053   | 1.02                      | 0.61    | n.d.    | n.d.    | 2.60 | 0.02    |
| Psmb8       | 1.05 | 0.34    | 0.96                      | 0.54    | 1.01    | 0.44    | 5.39 | 0.02    |
| Psmb9       | 0.96 | 0.11    | 1.00                      | 0.46    | 0.97    | 0.24    | 4.67 | 0.01    |
| Psmc2       | 0.98 | 0.92    | 0.54                      | 0.001   | n.d.    | n.d.    | 3.46 | 0.02    |
| Ptpn11      | 0.84 | 0.22    | 1.20                      | 0.42    | n.d.    | n.d.    | 2.79 | 0.02    |
| Rcc2        | 1.09 | 0.43    | 0.76                      | 0.02    | n.d.    | n.d.    | 3.24 | 0.07    |
| Rfc2        | 1.25 | 0.19    | 0.88                      | 0.03    | 1.06    | 0.18    | 5.31 | 0.02    |
| Rictor      | 1.26 | 0.02    | 1.15                      | 0.17    | 1.06    | 0.28    | 9.73 | 0.003   |
| Rpl27       | 0.91 | 0.47    | 1.10                      | 0.53    | n.d.    | n.d.    | 4.63 | 0.001   |
| Rps15       | 1.07 | 0.64    | 1.14                      | 0.44    | n.d.    | n.d.    | 2.52 | 0.02    |
| Sgk1        | 2.30 | 0.04    | 1.16                      | 0.07    | 0.9     | 0.13    | 9.21 | 0.03    |
| Supt16h     | 1.31 | 0.09    | 0.59                      | 0.004   | n.d.    | n.d.    | 8.91 | 0.01    |
| Taf6        | 1.08 | 0.42    | 0.77                      | 0.04    | n.d.    | n.d.    | 4.07 | 0.003   |
| Tfdp2       | 2.65 | 0.03    | 1.11                      | 0.87    | 1.29    | 0.04    | 7.92 | 0.004   |
| Tnfsf10     | 4.58 | 0.02    | 2.03                      | 0.04    | n.d.    | n.d.    | 8.97 | 0.01    |

**Table S7.** List of primers for quantitative real-time PCR analyses

| Gene symbol | Gene ID | Primer A                    | Primer B                   | Probe                         |
|-------------|---------|-----------------------------|----------------------------|-------------------------------|
| Ap2a1       | 11772   | CCTGGCTGTGTCTCGCTTA         | TGTAGTCCTGGAGGTCAGTGG      | Universal Library probe: #73  |
| Ap2a2       | 11771   | CTGTCTCGCTAGCTGTCTCG        | CCTGAAGATCTGTTGATGCAGA     | Universal Library probe: #15  |
| Bptf        | 207165  | CACCGTACGATGAGTCCAAA        | CCCGTGGTACCAATTCTGAC       | Universal Library probe: #76  |
| Bub1b       | 12236   | GTGTCTCGGAGGTGCTCTGAA       | TGGGGAAGTGCATTTAGGAA       | Universal Library probe: #85  |
| Ccnf        | 12449   | GGCTTTCTGTTGGGGACAT         | CCAGGTAAGTGGAGTGGGAGT      | Universal Library probe: #56  |
| Cenpm       | 66570   | TTGTGTTGTGATTAACCTGCAC      | AGCTGCTGTCCACGTGCT         | Universal Library probe: #25  |
| Chaf1b      | 110749  | GCAGATCGCCTTTCAGGA          | TTGCCAGCAAATATCATACA       | Universal Library probe: #63  |
| Chtf18      | 214901  | CACCTGATGGCAGTACCTC         | CTTTCGGGCAGGTAGTTCAG       | Universal Library probe: #78  |
| Dhcr7       | 13360   | CCTTGTGGGTCAGCTTCC          | CCACATAAAGTGGCAGAAATC      | Universal Library probe: #29  |
| Dtl         | 76843   | GCTGCCTACATTTGGAAGGT        | AGAATGAGCCAGGAGCACAG       | Universal Library probe: #88  |
| Erb2ip      | 59079   | AAATGGTGTCTACTAATTACATGTTCC | GCAGGATTAAGTCTTTCATTATCTGA | Universal Library probe: #66  |
| Hivep2      | 15273   | ATTGATTTTCATTGGAACATTCTCTC  | ATGATTTGCTCTGACGCTTCC      | Universal Library probe: #20  |
| Igf2r       | 16004   | TCAGTATGCAAAGTTCCTGTGG      | TTGAATATTGGAGGGCCTGT       | Universal Library probe: #53  |
| Mnat1       | 17420   | TGCAGCAGGCTCTGAAAAG         | AGCAGAGCAACAGGGAGGT        | Universal Library probe: #78  |
| Myb*        | 17863   | Mm00501741                  |                            |                               |
| Nsmaf       | 18201   | CTTGCAATGGCTCTTCAGTCT       | TCTTTGTAGCATTTTGGATTCTCT   | Universal Library probe: #10  |
| Pabpc1      | 18458   | GGTGCCAGACCTCATCCA          | TGTGAGGAAGCTGGTCTCATC      | Universal Library probe: #68  |
| Pin1**      | 23988   | ACAGTTCAGTGATTGCAGCTCTGCCA  | AAAGATCACCAGGAGCAAGGAGGA   | TGGTTTCTGCATCTGACCTCTGCT      |
| Psma3       | 19167   | GAAGCAGAGAAATATGCCAAGG      | GCAACTGTTCACAGAAATGTAACCA  | Universal Library probe: #60  |
| Psmb8       | 16913   | CACACTCGCCTTCAAGTTCC        | TCTCGATCACTTTGTTTCATCCTT   | Universal Library probe: #81  |
| Psmb9       | 16912   | GCCCAAGCCATAGCTGAC          | GATGTTCTTCACCAGTTTGC       | Universal Library probe: #78  |
| Psmd2       | 21762   | AATGGGAGATTCCAAGTCCA        | TGACATCTCCATTGCAGGAC       | Universal Library probe: #10  |
| Ptpn11      | 19247   | GAACATGACATCGCGGAGA         | AACTGCCATCGACTCCTCTG       | Universal Library probe: #18  |
| Rcc2        | 108911  | CTATCAGTTGGGGTCCATCG        | AGAAGATGCCATCCAGAGTCTT     | Universal Library probe: #79  |
| Rfc2        | 19718   | TTGAAGCTCAACGAAATAGTGG      | GGGCACATTGCCTTCTCTT        | Universal Library probe: #100 |
| Rictor      | 78757   | TTCCACTACAGACACAGTCCAGA     | TGGCTAGAAATCGTGCTTCTC      | Universal Library probe: #41  |
| Rpl27       | 19942   | TGAAAGGTTAGCGGAAGTGC        | TTTCATGAACCTGCCATCTC       | Universal Library probe: #40  |
| Rps15       | 20054   | TCGACCAACTGCTCGACAT         | GCGCTTGAGCAGTGAGTGT        | Universal Library probe: #82  |
| Sgk1        | 20393   | TGCCAGCAACACCTATGC          | GAGGGGTTAGCGTTCATAAGC      | Universal Library probe: #92  |
| Sup16h      | 114741  | TCATGAAGACCATTGTTGATGAC     | CGTCTCAGCGTCACTCC          | Universal Library probe: #83  |
| Taf6        | 21343   | GGATGTCTGCCTCAAAGCTC        | CTCAGCCTTCTGCTGCTCTT       | Universal Library probe: #20  |
| Tfdp2       | 211586  | CGCAATGGTCACTCAGACTC        | TCTCTAGCTCGTTTTCTATCACTGG  | Universal Library probe: #66  |
| Tnfsf10     | 22035   | TGAGAACCTTTCAGGACACCA       | GAGCTGCCACTTTCTGAGGT       | Universal Library probe: #52  |

\* Pre-designed Taqman gene expression assay from Applied Biosystems

\*\* Custom Taqman probe (Integrated DNA Technologies) specific assay
